# Supplementary material for: Quantitative Analysis of BTF3, HINT1, NDRG1 and ODC1 Protein Over-Expression in Human Prostate Cancer Tissue
Source: PubMed Central journal article supplement (PMC3874000; doi:10.1371/journal.pone.0084295), 2013-12-27
Supplement: pone.0084295.s005.pdf [file pone.0084295.s005.pdf]

Supplementary Table S1: **True positive and true negative rates for putative prostate cancer diagnostic markers from ROC curve analysis**

| <b>Biomarker</b>    | <b>AUC</b> | <b>Criteria &gt;</b> | <b>Sensitivity</b> | <b>1-Specificity</b> | <b>+ Likelihood ratios</b> |
|---------------------|------------|----------------------|--------------------|----------------------|----------------------------|
| <b><i>BTF3</i></b>  | 0.74       | 2.7                  | 0.74               | 0.6                  | 1.8                        |
| <b><i>HINT1</i></b> | 0.71       | 2.9                  | 0.67               | 0.61                 | 1.7                        |
| <b><i>NDRG1</i></b> | 0.76       | 3                    | 0.7                | 0.71                 | 2.4                        |
| <b><i>ODC1</i></b>  | 0.67       | 2.8                  | 0.68               | 0.62                 | 1.8                        |

Operating characteristics Sensitivity and 1-Specificity of the area fraction values for BTF3, HINT1, NDRG1 and ODC1 at a specific value (Criteria >) calculated using ROC curves. AUC = area under the curve. An AUC of >0.7 is considered to provide adequate discrimination for a diagnostic marker. 95% CI intervals (sensitivity; 1-specificity) are: BTF3 (0.69-0.8;0.5-0.63 ), HINT1 (0.61-0.74;0.52-0.65), NDRG1 (0.64-0.76;0.65-0.76), ODC1 (0.61-0.73;0.56-0.68). The data is tabulated from Figure 3.
