# Supplementary material for: Quantitative Analysis of BTF3, HINT1, NDRG1 and ODC1 Protein Over-Expression in Human Prostate Cancer Tissue
Source: PubMed Central journal article supplement (PMC3874000; doi:10.1371/journal.pone.0084295), 2013-12-27
Supplement: pone.0084295.s006.pdf [file pone.0084295.s006.pdf]

Supplementary Table S2. **Forty-one pairs of prostate cancer patients who had undergone radical prostatectomy, matched for pathological stage, Gleason sum score, preoperative PSA, and paired for relapse and non-relapse status. 82 patient samples were used in 41 pairs (adapted from reference (22), Nariculam, J et al, Asian J Androl 11: 109-118, 2009).**

| Pair No. | Non-relapser Pathological | Relapser Gleason | Pre-operative PSA stage | Follow-up grade | Pathological stage | Gleason grade (years) | Pre-operative PSA |
|----------|---------------------------|------------------|-------------------------|-----------------|--------------------|-----------------------|-------------------|
| 1        | pT3a                      | 3 + 4 = 7        | 9.7                     | 5               | pT3a               | 3 + 4 = 7             | 9.9               |
| 2        | pT3a                      | 3 + 4 = 7        | 6                       | 5               | pT3a               | 3 + 4 = 7             | 9.8               |
| 3        | pT3a                      | 3 + 3 = 6        | 7                       | 5               | pT3a               | 2 + 4 = 6             | 9                 |
| 4        | pT3a                      | 2 + 3 = 5        | 18                      | 5               | pT3a               | 2 + 3 = 5             | 15                |
| 5        | pT3a                      | 3 + 2 = 5        | 16                      | 5               | pT3a               | 3 + 2 = 5             | 19                |
| 6        | pT3a                      | 4 + 2 = 6        | 13                      | 5               | pT3a               | 2 + 4 = 6             | 10.2              |
| 7        | pT3a                      | 3 + 3 = 6        | 9                       | 5               | pT3a               | 3 + 3 = 6             | 4.3               |
| 8        | pT3a                      | 4 + 3 = 7        | 9                       | 5               | pT3a               | 4 + 3 = 7             | 8                 |
| 9        | pT3a                      | 3 + 4 = 7        | 8                       | 5               | pT3a               | 4 + 3 = 7             | 8                 |
| 10       | pT3a                      | 4 + 4 = 8        | 16                      | 5               | pT3a               | 4 + 4 = 8             | 16                |
| 11       | pT3a                      | 3 + 4 = 7        | 17                      | 5               | pT3a               | 4 + 3 = 7             | 14                |
| 12       | pT3a                      | 4 + 3 = 7        | 10                      | 5               | pT3a               | 4 + 3 = 7             | 12                |
| 13       | pT3a                      | 3 + 4 = 7        | 5                       | 5               | pT3a               | 4 + 3 = 7             | 8                 |
| 14       | pT3a                      | 4 + 3 = 7        | 6                       | 5               | pT3a               | 3 + 4 = 7             | 7                 |
| 15       | pT3a                      | 3 + 4 = 7        | 8                       | 5               | pT3a               | 3 + 4 = 7             | 8                 |
| 16       | pT3a                      | 3 + 4 = 7        | 8                       | 5               | pT3a               | 3 + 4 = 7             | 8                 |
| 17       | pT3a                      | 3 + 2 = 5        | 7                       | 5               | pT3a               | 3 + 2 = 5             | 5                 |
| 18       | pT3b                      | 4 + 3 = 7        | 13                      | 5               | pT3b               | 4 + 3 = 7             | 12                |
| 19       | pT3a                      | 4 + 3 = 7        | 18                      | 3               | pT3a               | 4 + 3 = 7             | 17                |
| 20       | pT3a                      | 3 + 4 = 7        | 6                       | 3               | pT3a               | 4 + 3 = 7             | 8                 |
| 21       | pT3a                      | 3 + 4 = 7        | 4                       | 7               | pT3a               | 4 + 3 = 7             | 8                 |
| 22       | pT3a                      | 3 + 4 = 7        | 5                       | 7               | pT3a               | 4 + 3 = 7             | 7                 |
| 23       | pT3a                      | 3 + 4 = 7        | 6                       | 3               | pT3a               | 3 + 4 = 7             | 6                 |
| 24       | pT3a                      | 3 + 4 = 7        | 10                      | 3               | pT3a               | 3 + 4 = 7             | 10                |
| 25       | pT3a                      | 3 + 4 = 7        | 17                      | 7               | pT3a               | 4 + 3 = 7             | 16                |
| 26       | pT3a                      | 3 + 4 = 7        | 6                       | 3               | pT3a               | 4 + 3 = 7             | 5                 |
| 27       | pT3a                      | 3 + 4 = 7        | 14                      | 3               | pT3a               | 3 + 4 = 7             | 14                |
| 28       | pT3a                      | 3 + 2 = 5        | 6                       | 7               | pT3a               | 2 + 3 = 5             | 9                 |
| 29       | pT3a                      | 3 + 4 = 7        | 7                       | 3               | pT3a               | 4 + 3 = 7             | 6                 |
| 30       | pT3a                      | 3 + 4 = 7        | 11                      | 3               | pT3a               | 4 + 3 = 7             | 18                |
| 31       | pT3a                      | 3 + 4 = 7        | 13                      | 3               | pT3a               | 4 + 3 = 7             | 16                |
| 32       | pT3a                      | 3 + 4 = 7        | 6                       | 3               | pT3a               | 4 + 3 = 7             | 9                 |

|    |      |             |    |    |      |             |    |
|----|------|-------------|----|----|------|-------------|----|
| 33 | pT3a | $3 + 4 = 7$ | 9  | 8  | pT3a | $4 + 3 = 7$ | 8  |
| 34 | pT3a | $3 + 4 = 7$ | 14 | 3  | pT3a | $4 + 3 = 7$ | 16 |
| 35 | pT3a | $3 + 4 = 7$ | 20 | 3  | pT3a | $4 + 3 = 7$ | 21 |
| 36 | pT3a | $4 + 4 = 8$ | 15 | 10 | pT3a | $5 + 3 = 8$ | 14 |
| 37 | pT3a | $3 + 4 = 7$ | 7  | 10 | pT3a | $3 + 4 = 7$ | 11 |
| 38 | pT3a | $3 + 4 = 7$ | 10 | 7  | pT3a | $3 + 4 = 7$ | 10 |
| 39 | pT3b | $4 + 3 = 7$ | 13 | 3  | pT3b | $4 + 3 = 7$ | 18 |
| 40 | pT3b | $3 + 4 = 7$ | 8  | 3  | pT3b | $3 + 4 = 7$ | 7  |
| 41 | pT3b | $4 + 3 = 7$ | 22 | 10 | pT3b | $4 + 3 = 7$ | 13 |
